# Supplementary material for: A water-soluble copper-immobilized covalent organic framework functioning as an “OFF–ON” fluorescent sensor for amino acids
Source: Royal Society of Chemistry journal article supplement (doi:10.1039/d1ma00234a), 2021-01-01
Supplement: d1ma00234a1.pdf [file d1ma00234a1.pdf]

## Supporting Information

### **A Water-Soluble Copper-Immobilized Covalent Organic Framework Functioning as an “OFF–ON” Fluorescent Sensor for Amino Acids**

Lamiaa Reda Ahmed,<sup>a</sup> Ahmed F. M. EL-Mahdy,<sup>b</sup> Cheng-Tang Pan,<sup>a,c</sup> and Shiao-Wei Kuo\*<sup>b,d</sup>

*<sup>a</sup>Institute of Medical Science and Technology, National Sun Yat-Sen University, Kaohsiung 80424, Taiwan.*

*<sup>b</sup>Department of Materials and Optoelectronic Science, National Sun Yat-Sen University, Kaohsiung 80424, Taiwan.*

*<sup>c</sup>Department of Mechanical and Electro-Mechanical Engineering, National Sun Yat-Sen University, Kaohsiung 80424, Taiwan.*

*<sup>d</sup>Department of Medicinal and Applied Chemistry, Kaohsiung Medical University, Kaohsiung 807, Taiwan.*

Corresponding authors:

Shiao-Wei Kuo, +886-7-5252000 ext 4079, E-mail: [kuosw@faculty.nsysu.edu.tw](mailto:kuosw@faculty.nsysu.edu.tw)

| <b>Section</b> | <b>Content</b>                                                                 | <b>Page No.</b> |
|----------------|--------------------------------------------------------------------------------|-----------------|
| <b>S1</b>      | <b>Characterization</b>                                                        | <b>S3</b>       |
| <b>S2</b>      | <b>Synthetic Procedures</b>                                                    | <b>S4</b>       |
| <b>S3</b>      | <b>Spectral Profiles of Monomers</b>                                           | <b>S5</b>       |
| <b>S4</b>      | <b>PXRD data and BET parameters</b>                                            | <b>S8</b>       |
| <b>S5</b>      | <b>Structural Modeling and Fractional Atomic Coordinates for COF Structure</b> | <b>S8</b>       |
| <b>S6</b>      | <b>Field Emission Scanning Electron Microscopy (FE-SEM)</b>                    | <b>S12</b>      |
| <b>S7</b>      | <b>Transmission Electron Microscopy (TEM)</b>                                  | <b>S12</b>      |
| <b>S8</b>      | <b>Thermal Gravimetric Analysis</b>                                            | <b>S13</b>      |
| <b>S9</b>      | <b>Chemical Stability of the TFPB-DHTH COF</b>                                 | <b>S13</b>      |
| <b>S10</b>     | <b>Photophysical Properties of TFPB-DHTH COF</b>                               | <b>S15</b>      |
| <b>S11</b>     | <b>X-Ray photoelectron spectroscopy (XPS) analysis</b>                         | <b>S16</b>      |
| <b>S12</b>     | <b>“OFF-ON” Fluorescence Detection Assay</b>                                   | <b>S17</b>      |
| <b>S13</b>     | <b>References</b>                                                              | <b>S20</b>      |

## S1. Characterization

**<sup>1</sup>H and <sup>13</sup>C NMR spectroscopy.** NMR spectra were recorded using an INOVA 500 instrument with DMSO-*d*<sub>6</sub> and CDCl<sub>3</sub> as solvents and tetramethylsilane (TMS) as the external standard. Chemical shifts are provided in parts per million (ppm).

**Fourier-transform infrared spectroscopy (FTIR) spectroscopy.** FTIR spectra were recorded using a Bruker Tensor 27 FTIR spectrophotometer and the conventional KBr plate method; 32 scans were collected at a resolution of 4 cm<sup>-1</sup>.

**Solid state nuclear magnetic resonance (SSNMR) spectroscopy.** SSNMR spectra were recorded using a Bruker avance III HD Solid State NMR spectrometer in National Cheng Kung University and a Bruker magic-angle-spinning (MAS) probe, running 32,000 scans.

**Thermogravimetric analysis (TGA).** TGA was performed using a TA Q-50 analyzer under a flow of N<sub>2</sub>. The samples were sealed in a Pt cell and heated from 40 to 800 °C at a heating rate of 20 °C min<sup>-1</sup> under N<sub>2</sub> at a flow rate of 50 mL min<sup>-1</sup>.

**Powder X-Ray Diffraction (PXRD).** PXRD was performed using a Siemens D5000 and monochromated Cu/Kα ( $\lambda = 0.1542 \text{ nm}$ ). The sample was spread in a thin layer on the square recess of an XRD sample holder.

**Surface area and porosimetry (ASAP/BET).** The BET surface areas and porosimetry measurements of the prepared samples (ca. 20–100 mg) were performed using a Micromeritics ASAP 2020 Surface Area and Porosity analyzer. Nitrogen isotherms were generated through incremental exposure to ultrahigh-purity N<sub>2</sub> (up to ca. 1 atm) in a liquid N<sub>2</sub> (77 K) bath.

**COF structural simulations.** Molecular modeling was performed using Reflex, a software package for crystal determination from XRD patterns. Unit cell dimensions were first determined manually from the observed XRD peak positions using the coordinates.

## S2. Synthetic Procedures

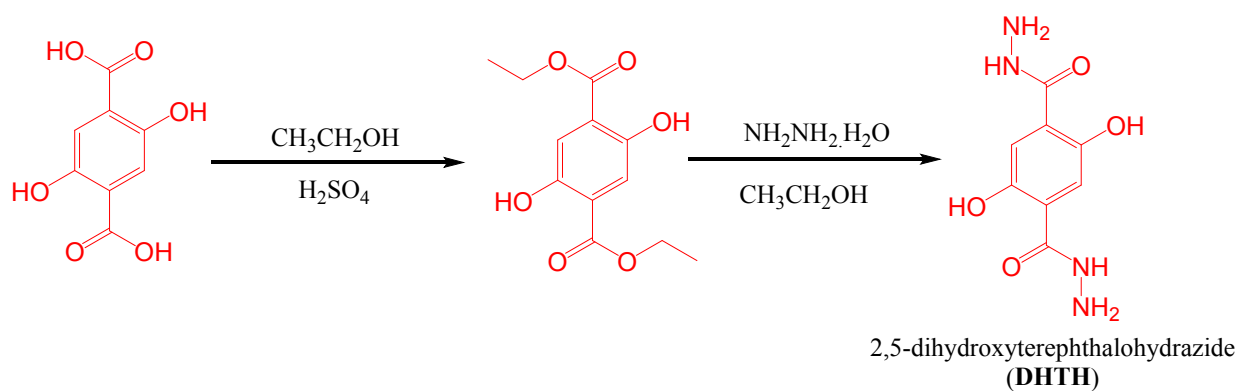

**Scheme S1.** Synthesis of 2,5-dihydroxyterephthalohydrazide (DHTH).

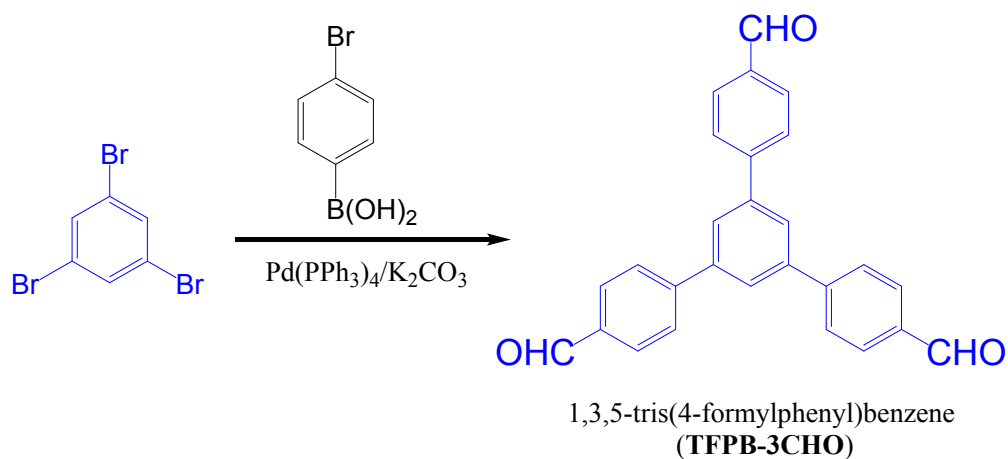

**Scheme S2.** Synthesis of 1,3,5-tris(4-formylphenyl)benzene (TFPB-3CHO).

### S3. Spectral Profiles of monomers

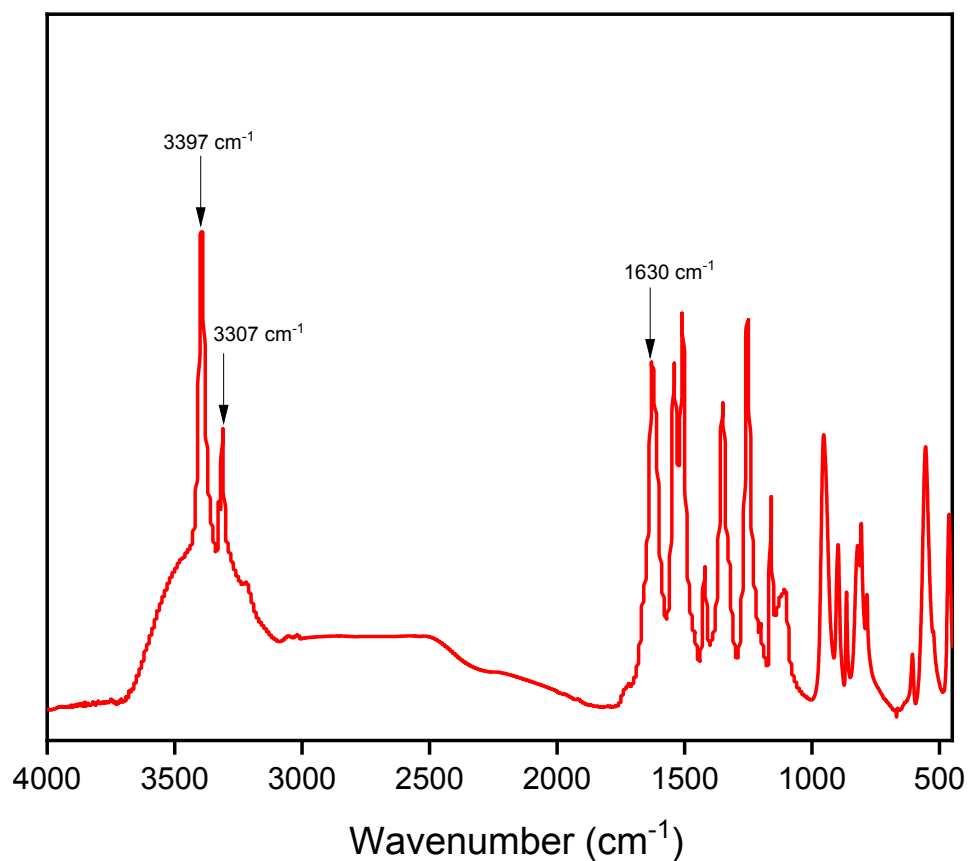

**Figure S1.** FT-IR spectrum of 2,5-dihydroxyterephthalohydrazide (DHTH).

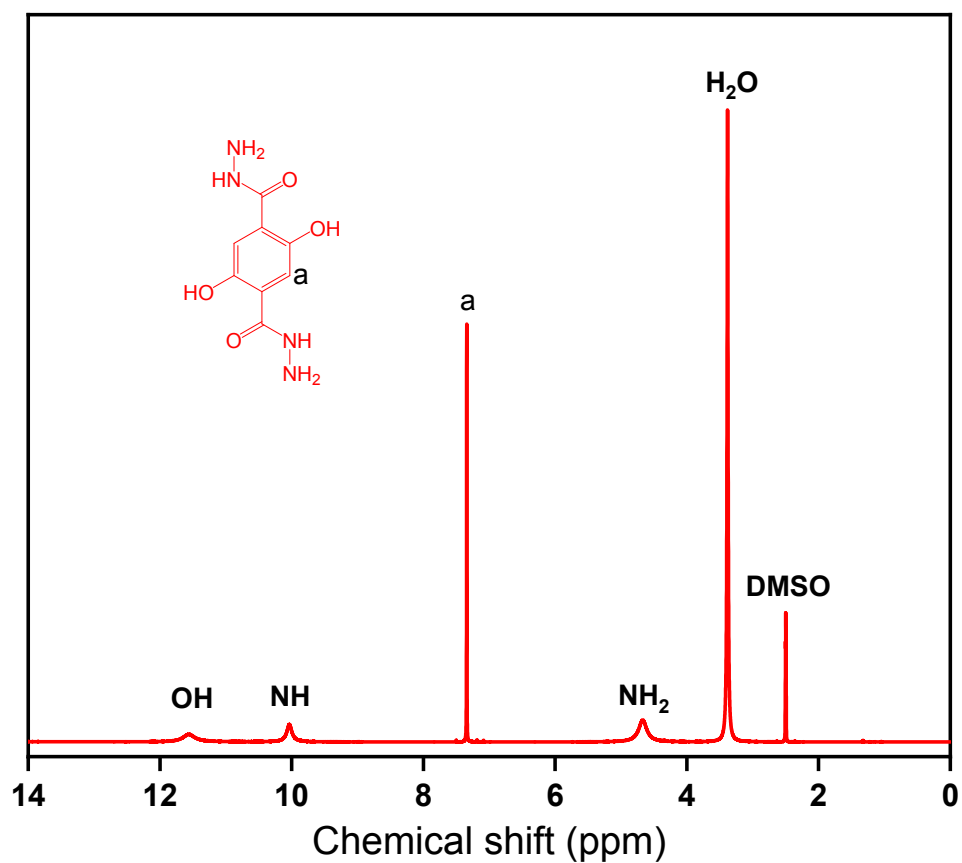

**Figure S2.**  $^1\text{H}$  NMR spectrum of 2,5-dihydroxyterephthalohydrazide (DHTH).

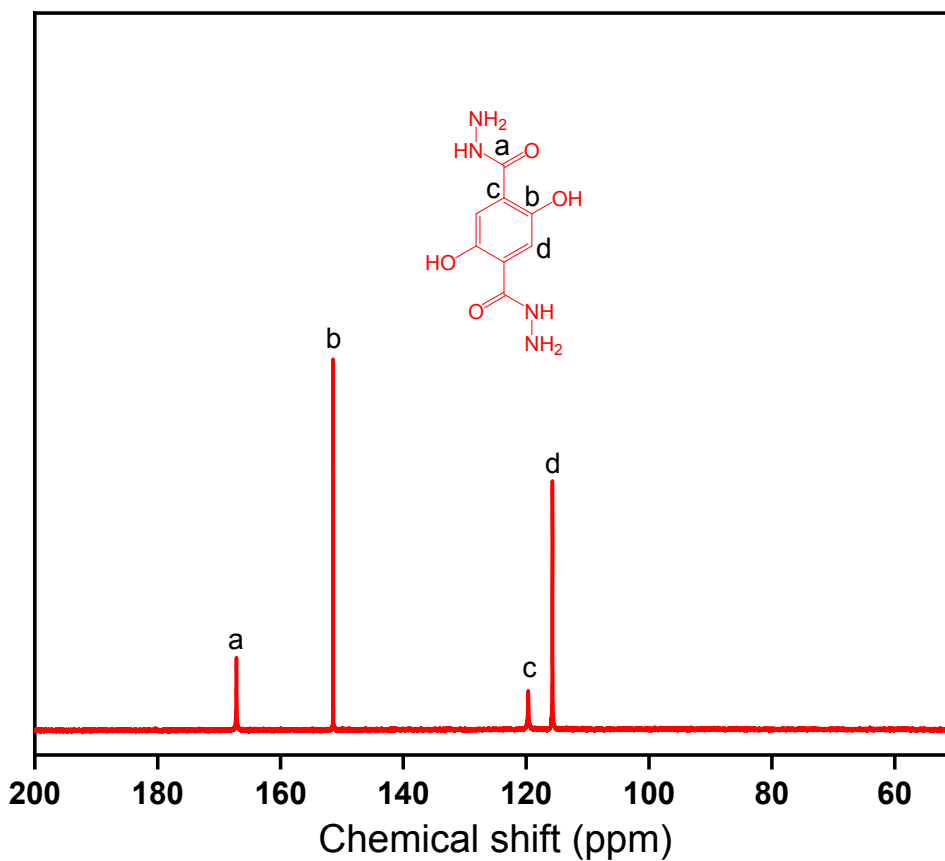

**Figure S3.**  $^{13}\text{C}$  NMR spectrum of 2,5-dihydroxyterephthalohydrazide (DHTH).

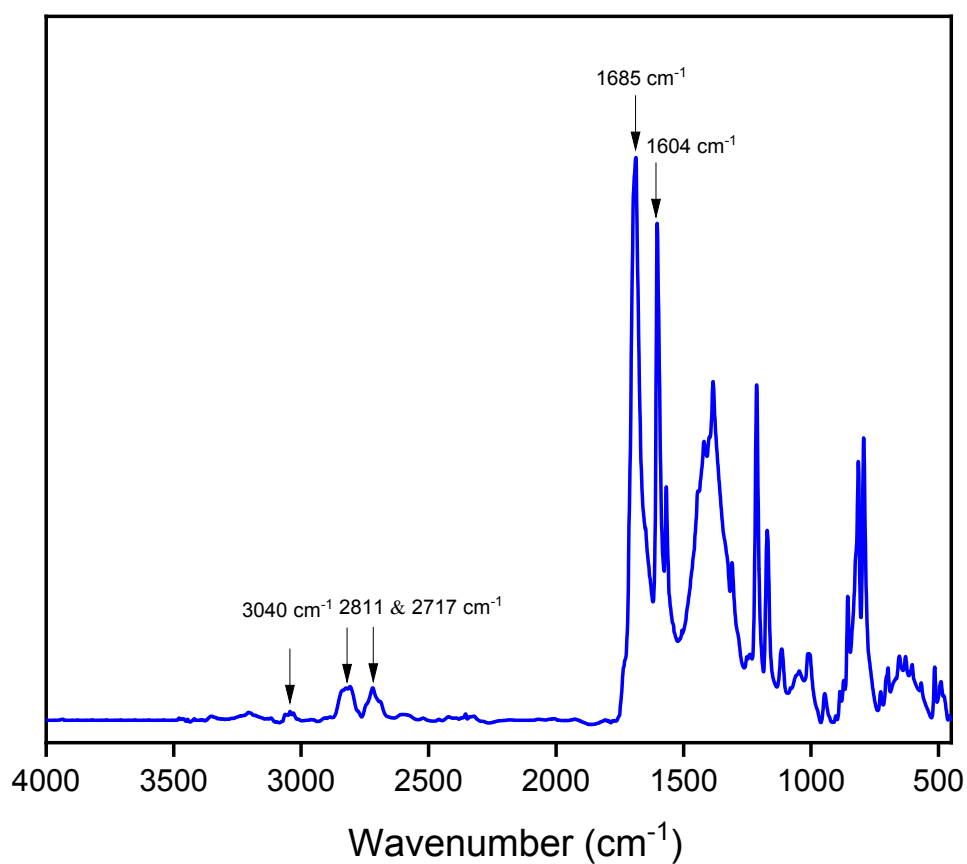

**Figure S4.** FT-IR spectrum of 1,3,5-tris(4-formylphenyl)benzene (TFPB-3CHO).

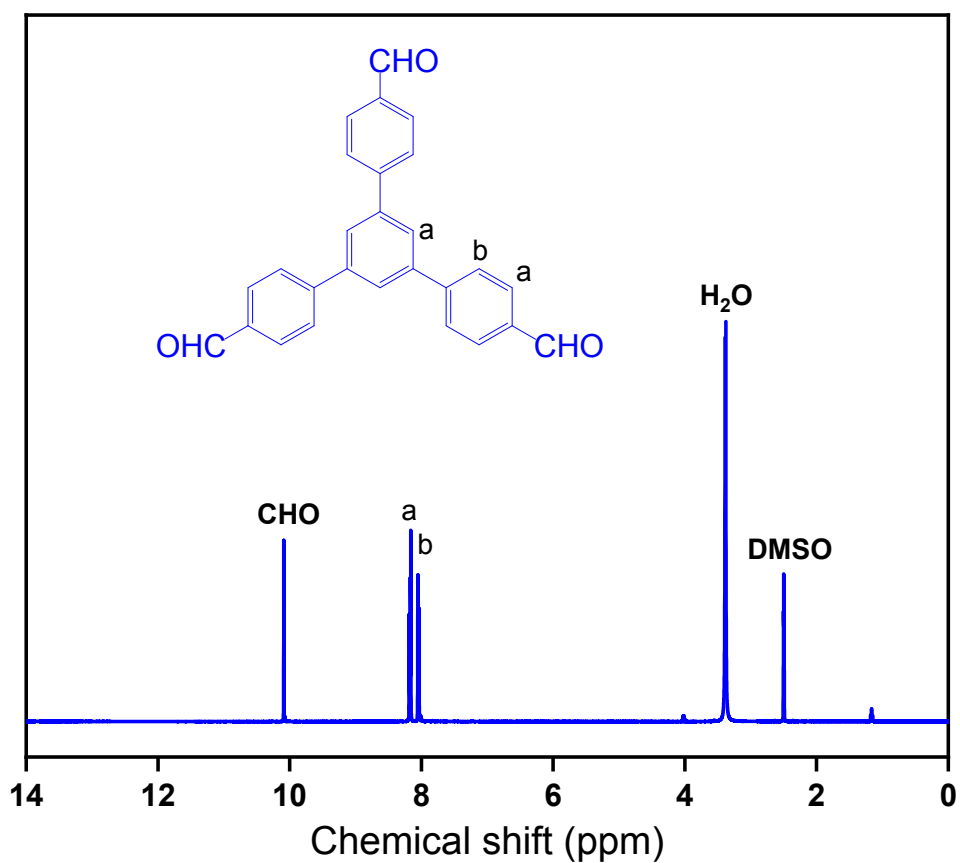

**Figure S5.**  $^1\text{H}$  NMR spectrum of 1,3,5-tris(4-formylphenyl)benzene (TFPB-3CHO).

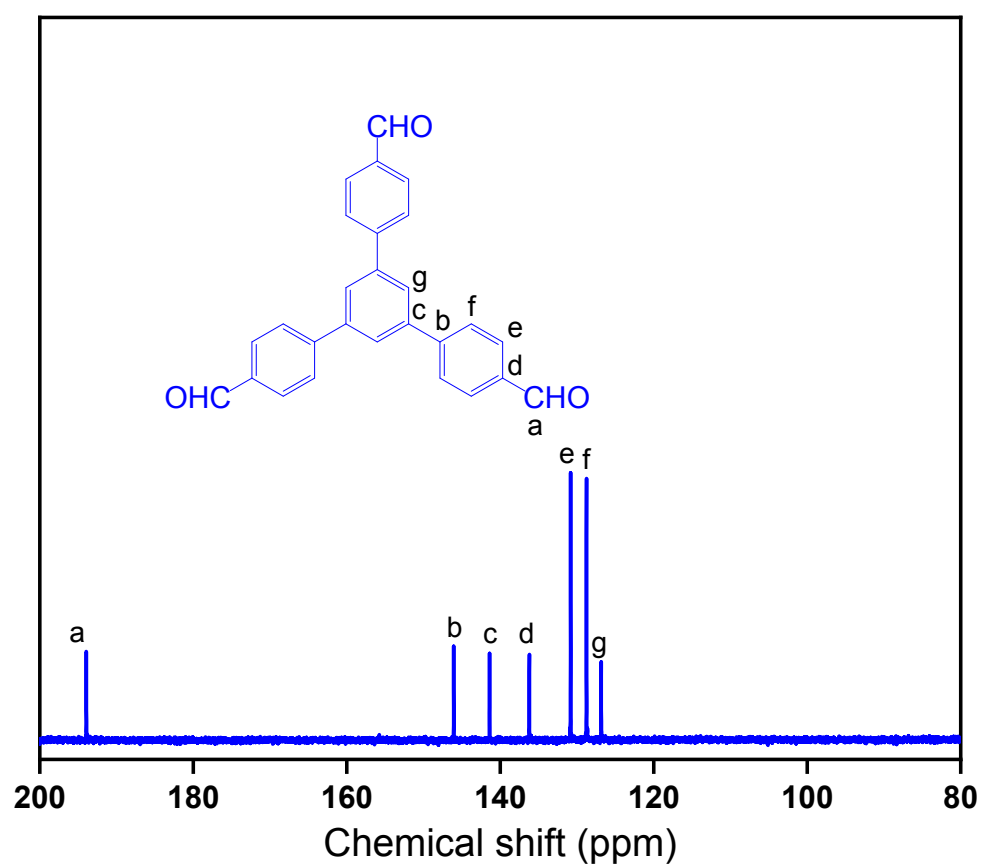

**Figure S6.**  $^{13}\text{C}$  NMR spectrum of 1,3,5-tris(4-formylphenyl)benzene (TFPB-3CHO).

## S4. PXRD data and BET parameters

Table S1. PXRD and BET parameters of the synthesized COFs.

| COF       | $S_{\text{BET}}$<br>( $\text{m}^2 \text{g}^{-1}$ ) | $d_{100}$<br>(nm) | Pore size<br>(nm) | Pore volume<br>( $\text{cm}^3 \text{g}^{-1}$ ) | Interlayer<br>Distance ( $\text{\AA}$ ) |
|-----------|----------------------------------------------------|-------------------|-------------------|------------------------------------------------|-----------------------------------------|
| TFPB-DHTH | 360                                                | 4.01              | 3.77              | 0.58                                           | 3.45                                    |

## S5. Structural Modeling and Fractional Atomic Coordinates for COF Structure

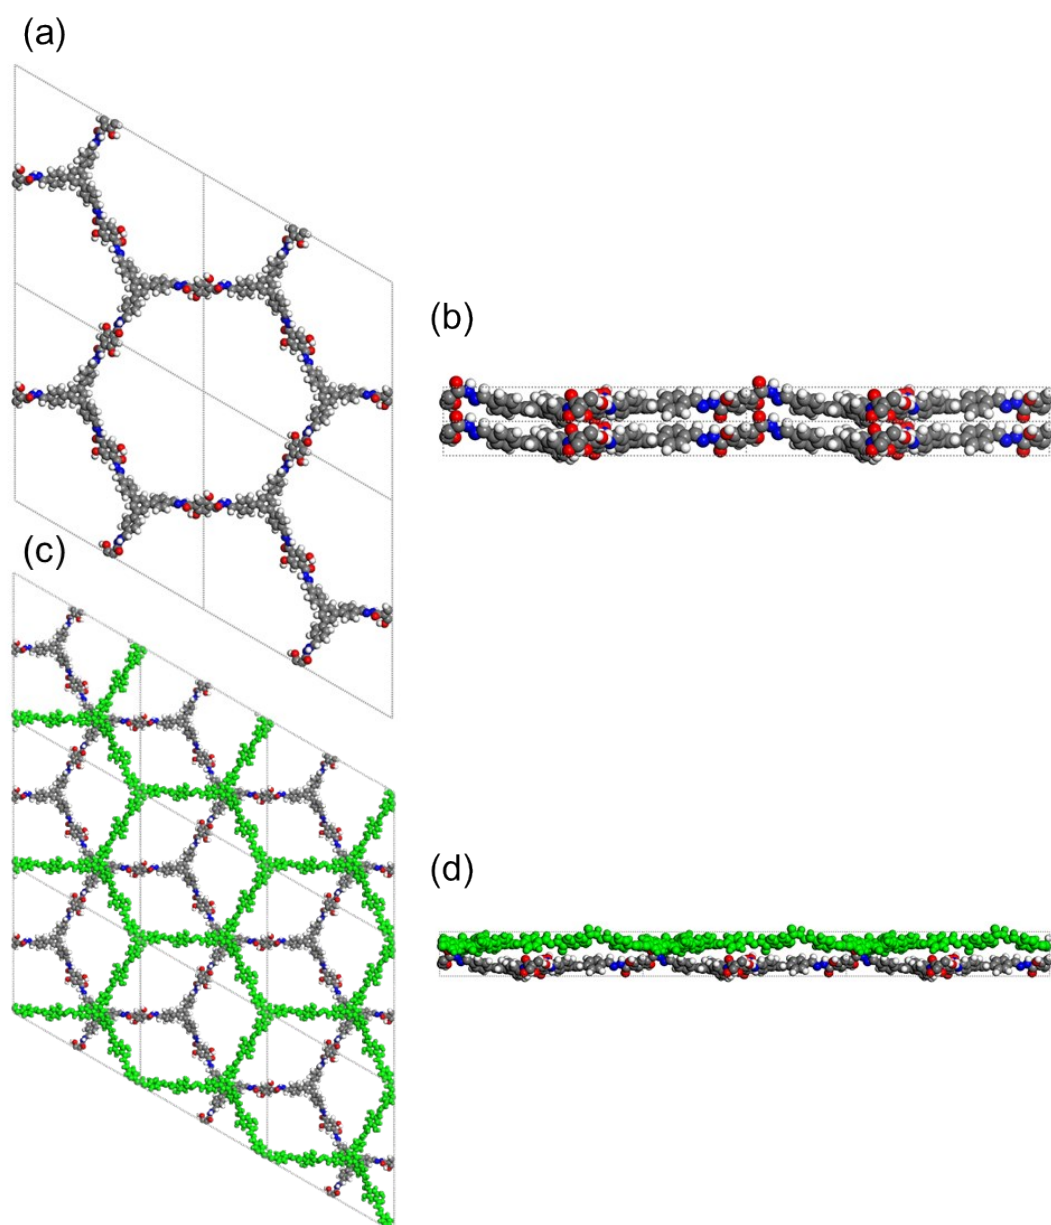

Figure S7. Crystalline structure for the TFPB-DHTH COF (a, b) completely eclipsed AA-stacking models and (c, d) staggered AB-stacking successions models.



**Table S2.** Fractional atomic coordinates for the unit cell of the TFPB-DHTH COF with eclipsed AA-stacking model.

| Sample Name : TFPB-DHTH COF              |         |         |                        |                                                 |         |         |         |
|------------------------------------------|---------|---------|------------------------|-------------------------------------------------|---------|---------|---------|
| Space Group : P 1                        |         |         |                        |                                                 |         |         |         |
| a = 46.23100 , b = 46.23100, c = 4.07851 |         |         |                        | $\alpha = \beta = 90^\circ, \gamma = 120^\circ$ |         |         |         |
| R <sub>wp</sub> = 4.91%                  |         |         | R <sub>p</sub> = 3.72% |                                                 |         |         |         |
| Atom                                     | x/a     | y/b     | z/c                    | Atom                                            | x/a     | y/b     | z/c     |
| C1                                       | 0.60426 | 0.16673 | 0.5738                 | C30                                             | 0.46226 | 0.45959 | 0.25054 |
| C2                                       | 0.63673 | 0.19111 | 0.65973                | C31                                             | 0.48424 | 0.44661 | 0.26022 |
| C3                                       | 0.65015 | 0.22492 | 0.58724                | C32                                             | 0.51808 | 0.46671 | 0.34016 |
| C4                                       | 0.63177 | 0.23618 | 0.42363                | C33                                             | 0.52917 | 0.50025 | 0.42553 |
| C5                                       | 0.59947 | 0.21165 | 0.32712                | C34                                             | 0.50722 | 0.51309 | 0.4148  |
| C6                                       | 0.58584 | 0.17733 | 0.40141                | C35                                             | 0.3656  | 0.59073 | 0.29195 |
| C7                                       | 0.64626 | 0.27342 | 0.37002                | C36                                             | 0.3855  | 0.57542 | 0.31643 |
| C8                                       | 0.68111 | 0.29453 | 0.33079                | C37                                             | 0.41322 | 0.58845 | 0.50815 |
| C9                                       | 0.69591 | 0.32958 | 0.30566                | C38                                             | 0.42057 | 0.61732 | 0.67092 |
| C10                                      | 0.67483 | 0.34363 | 0.31535                | C39                                             | 0.40109 | 0.63278 | 0.6441  |
| C11                                      | 0.63981 | 0.32357 | 0.35304                | C40                                             | 0.37315 | 0.6198  | 0.45534 |
| C12                                      | 0.62599 | 0.2884  | 0.37741                | C41                                             | 0.39172 | 0.74692 | 0.30685 |
| C13                                      | 0.73343 | 0.35151 | 0.27487                | C42                                             | 0.40689 | 0.782   | 0.34308 |
| C14                                      | 0.75573 | 0.34509 | 0.4376                 | C43                                             | 0.39395 | 0.79577 | 0.54594 |
| C15                                      | 0.7907  | 0.36565 | 0.4086                 | C44                                             | 0.36507 | 0.77355 | 0.70481 |
| C16                                      | 0.80453 | 0.39298 | 0.21231                | C45                                             | 0.34959 | 0.73876 | 0.66409 |
| C17                                      | 0.78231 | 0.39921 | 0.04827                | C46                                             | 0.36282 | 0.72468 | 0.46771 |
| C18                                      | 0.74743 | 0.37907 | 0.08071                | C47                                             | 0.31649 | 0.61655 | 0.4326  |
| C19                                      | 0.61798 | 0.33947 | 0.38123                | C48                                             | 0.35178 | 0.63618 | 0.43683 |
| C20                                      | 0.62477 | 0.36861 | 0.22251                | C49                                             | 0.36648 | 0.67142 | 0.43972 |
| C21                                      | 0.60444 | 0.38338 | 0.2541                 | C50                                             | 0.34683 | 0.68705 | 0.44126 |
| C22                                      | 0.57668 | 0.36946 | 0.44562                | C51                                             | 0.31162 | 0.66652 | 0.43353 |
| C23                                      | 0.57005 | 0.34051 | 0.60386                | C52                                             | 0.29576 | 0.63115 | 0.43066 |
| C24                                      | 0.59028 | 0.3259  | 0.57316                | C53                                             | 0.2065  | 0.55569 | 0.34482 |
| C25                                      | 0.43456 | 0.5726  | 0.55288                | C54                                             | 0.24137 | 0.5767  | 0.31905 |
| C26                                      | 0.55389 | 0.38371 | 0.48768                | C55                                             | 0.25777 | 0.60946 | 0.43623 |
| C27                                      | 0.54222 | 0.45405 | 0.30016                | C56                                             | 0.2373  | 0.62071 | 0.56695 |
| C28                                      | 0.45136 | 0.50836 | 0.27167                | C57                                             | 0.20225 | 0.59995 | 0.58412 |
| C29                                      | 0.4737  | 0.49345 | 0.32085                | C58                                             | 0.18643 | 0.56694 | 0.47801 |

Continuous (Table S3)

| Atom | $x/a$   | $y/b$    | $z/c$   | Atom | $x/a$   | $y/b$   | $z/c$    |
|------|---------|----------|---------|------|---------|---------|----------|
| C59  | 0.15043 | 0.54272  | 0.54611 | O94  | 0.55116 | 0.04217 | 1.12888  |
| C60  | 0.06628 | 0.50066  | 0.51526 | O95  | 0.03054 | 0.53167 | 0.8047   |
| C61  | 0.01017 | 0.45985  | 0.31285 | O96  | 0.42899 | 0.43868 | 0.171    |
| C62  | 0.02951 | 0.48861  | 0.48527 | O97  | 0.5616  | 0.52172 | 0.52563  |
| C63  | 0.01257 | 0.50192  | 0.64602 | O98  | 0.48433 | 0.03746 | 0.53628  |
| C64  | 0.58939 | 0.13348  | 0.72852 | O99  | 0.43866 | 0.91378 | 0.14689  |
| C65  | 0.54364 | 0.04903  | 0.89174 | O100 | 0.51578 | 0.93492 | 0.64883  |
| C66  | 0.52993 | -0.00736 | 0.71674 | H101 | 0.90904 | 0.42221 | 0.75111  |
| C67  | 0.52255 | 0.01895  | 0.7001  | H102 | 0.9588  | 0.41405 | 0.14448  |
| C68  | 0.49296 | 0.01246  | 0.55459 | H103 | 0.65146 | 0.18419 | 0.79835  |
| C69  | 0.41183 | 0.83225  | 0.62778 | H104 | 0.67461 | 0.24256 | 0.67369  |
| C70  | 0.45369 | 0.91791  | 0.37901 | H105 | 0.58451 | 0.21903 | 0.19805  |
| C71  | 0.47773 | 0.9531   | 0.48059 | H106 | 0.56043 | 0.15948 | 0.33756  |
| C72  | 0.5079  | 0.96027  | 0.61426 | H107 | 0.69703 | 0.28362 | 0.31656  |
| C73  | 0.47116 | 0.97982  | 0.4405  | H108 | 0.68601 | 0.37053 | 0.30609  |
| C74  | 0.84161 | 0.41458  | 0.16635 | H109 | 0.59939 | 0.27263 | 0.4097   |
| C75  | 0.92055 | 0.43616  | 0.51981 | H110 | 0.74614 | 0.32445 | 0.59198  |
| C76  | 0.95789 | 0.45566  | 0.48071 | H111 | 0.80705 | 0.36    | 0.53742  |
| C77  | 0.9751  | 0.44328  | 0.3108  | H112 | 0.792   | 0.4197  | -0.10777 |
| C78  | 0.97717 | 0.48524  | 0.64455 | H113 | 0.73131 | 0.38453 | -0.05292 |
| N79  | 0.4328  | 0.54845  | 0.3887  | H114 | 0.64543 | 0.37968 | 0.06852  |
| N80  | 0.45352 | 0.53428  | 0.44079 | H115 | 0.61017 | 0.40549 | 0.12673  |
| N81  | 0.55825 | 0.41109  | 0.36125 | H116 | 0.5492  | 0.32924 | 0.75627  |
| N82  | 0.5358  | 0.42335  | 0.40717 | H117 | 0.58452 | 0.30425 | 0.70698  |
| N83  | 0.1262  | 0.55042  | 0.52049 | H118 | 0.45268 | 0.58221 | 0.73097  |
| N84  | 0.0927  | 0.52953  | 0.6487  | H119 | 0.53272 | 0.37037 | 0.63409  |
| N85  | 0.56254 | 0.10523  | 0.65474 | H120 | 0.46983 | 0.54245 | 0.6207   |
| N86  | 0.54717 | 0.08052  | 0.87915 | H121 | 0.5142  | 0.40946 | 0.53338  |
| N87  | 0.42914 | 0.85674  | 0.44291 | H122 | 0.47512 | 0.42105 | 0.19282  |
| N88  | 0.44784 | 0.89038  | 0.54431 | H123 | 0.51697 | 0.53908 | 0.47151  |
| N89  | 0.86352 | 0.41531  | 0.35348 | H124 | 0.34458 | 0.5801  | 0.14152  |
| N90  | 0.89872 | 0.43529  | 0.31457 | H125 | 0.37926 | 0.55335 | 0.18661  |
| N91  | 0.43148 | 0.49789  | 0.06753 | H126 | 0.44147 | 0.62788 | 0.82297  |
| O92  | 0.56789 | 0.47115  | 0.16181 | H127 | 0.40742 | 0.65453 | 0.7785   |
| O93  | 0.07811 | 0.51141  | 0.76167 | H128 | 0.40253 | 0.73711 | 0.1519   |

Continuous (**Table S3**)

| Atom | $x/a$   | $y/b$   | $z/c$   | Atom | $x/a$   | $y/b$    | $z/c$    |
|------|---------|---------|---------|------|---------|----------|----------|
| H129 | 0.42937 | 0.79829 | 0.22056 | H143 | 0.5549  | 0.09004  | 1.09248  |
| H130 | 0.35479 | 0.78315 | 0.86767 | H144 | 0.55265 | -0.00281 | 0.82681  |
| H131 | 0.32789 | 0.72271 | 0.79647 | H145 | 0.01616 | 0.53844  | 0.92055  |
| H132 | 0.30524 | 0.5897  | 0.44415 | H146 | 0.42304 | 0.41522  | 0.11419  |
| H133 | 0.39339 | 0.68685 | 0.4464  | H147 | 0.57586 | 0.51118  | 0.5624   |
| H134 | 0.29659 | 0.67843 | 0.42586 | H148 | 0.46269 | 0.0298   | 0.42389  |
| H135 | 0.19516 | 0.53031 | 0.26262 | H149 | 0.40929 | 0.83837  | 0.85458  |
| H136 | 0.25547 | 0.56697 | 0.20857 | H150 | 0.45842 | 0.89514  | 0.75488  |
| H137 | 0.24835 | 0.64516 | 0.6676  | H151 | 0.44842 | 0.97464  | 0.32881  |
| H138 | 0.18766 | 0.60907 | 0.69633 | H152 | 0.53849 | 0.94318  | 0.74377  |
| H139 | 0.14444 | 0.51884 | 0.64124 | H153 | 0.8503  | 0.43044  | -0.02783 |
| H140 | 0.10755 | 0.55107 | 0.50868 | H154 | 0.90968 | 0.44937  | 0.12957  |
| H141 | 0.02228 | 0.44895 | 0.18691 | H155 | 0.96457 | 0.49485  | 0.77931  |
| H142 | 0.60098 | 0.13456 | 0.93938 | H156 | 0.93344 | 0.40241  | 0.14459  |

## S6. Field Emission Scanning Electron Microscopy (FE-SEM)

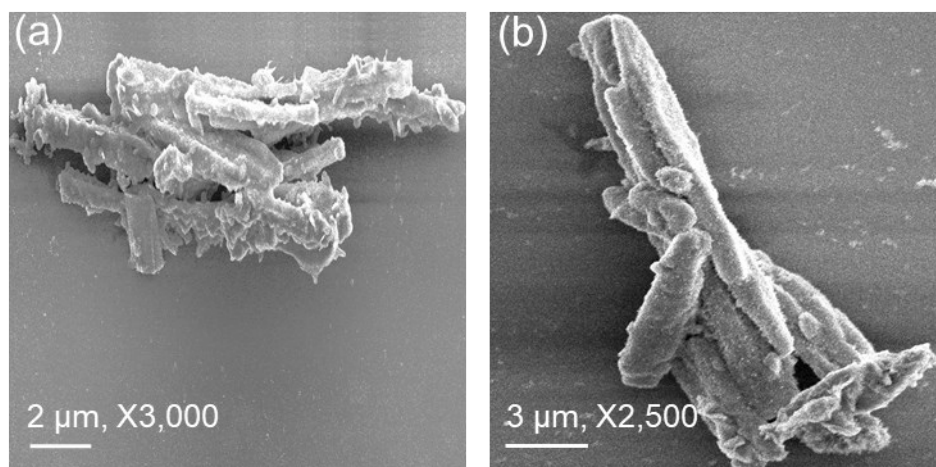

**Figure S8.** FE-SEM images of the TFPB-DHTH COF at different magnification scales: (a) 2 μm, X3,000 and (b) 3 μm, X2,500.

## S7. Transmission Electron Microscopy (TEM)

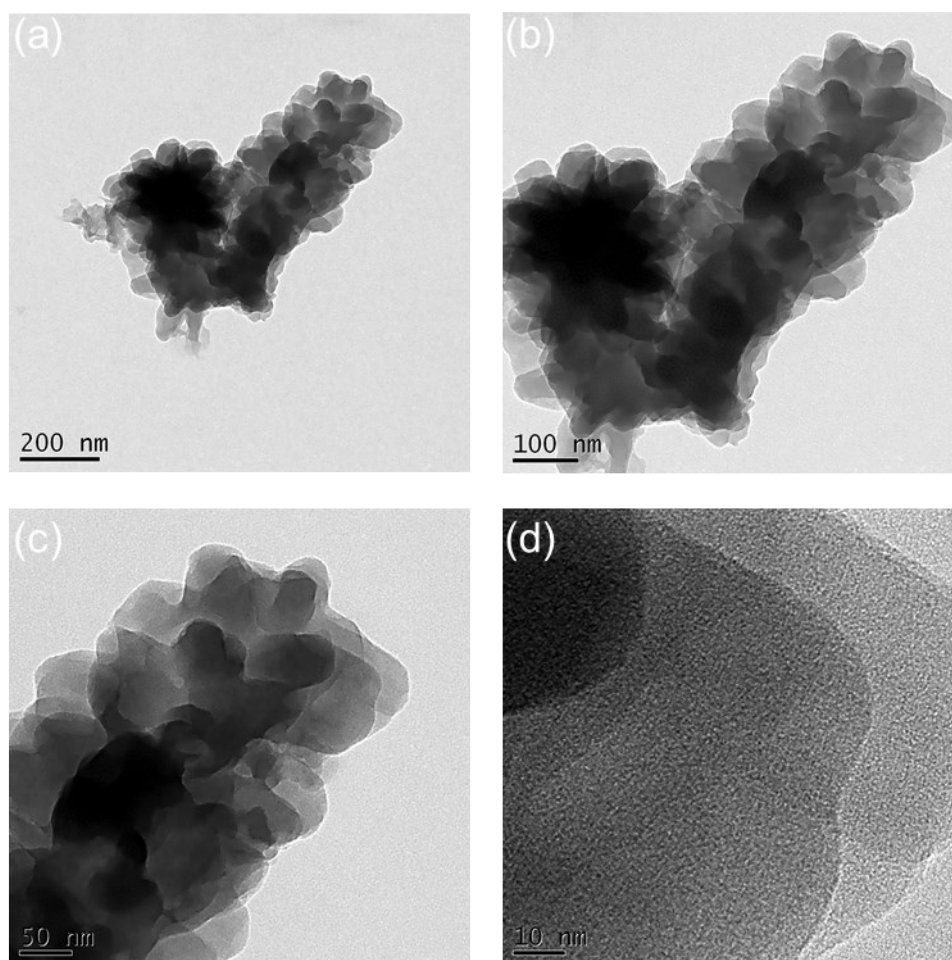

**Figure S9.** TEM images of the TFPB-DHTH COF different magnification scales: (a) 200 nm, (b) 100 nm, (c) 50 nm, and (d) 10 nm.

## S8. Thermal Gravimetric Analysis

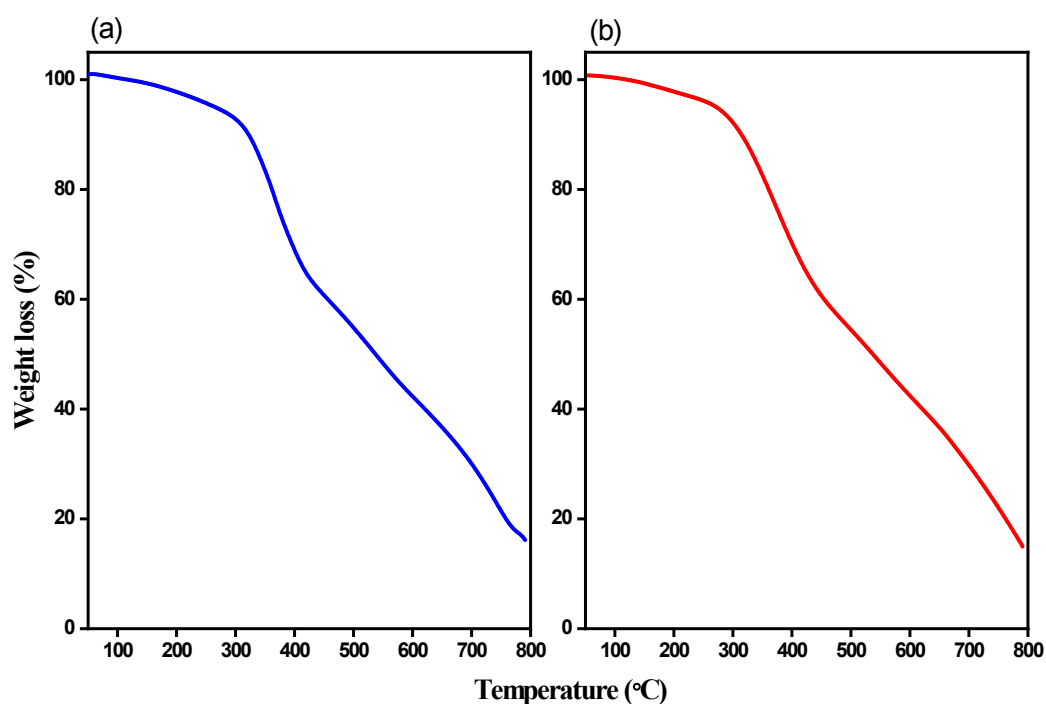

**Figure S10.** Thermogravimetric analysis trace of the TFPB-DHTH COF under (a) nitrogen and (b) air atmospheres with heating rate of  $20^{\circ}\text{C min}^{-1}$ .

## S9. Chemical Stability of the TFPB-DHTH COF

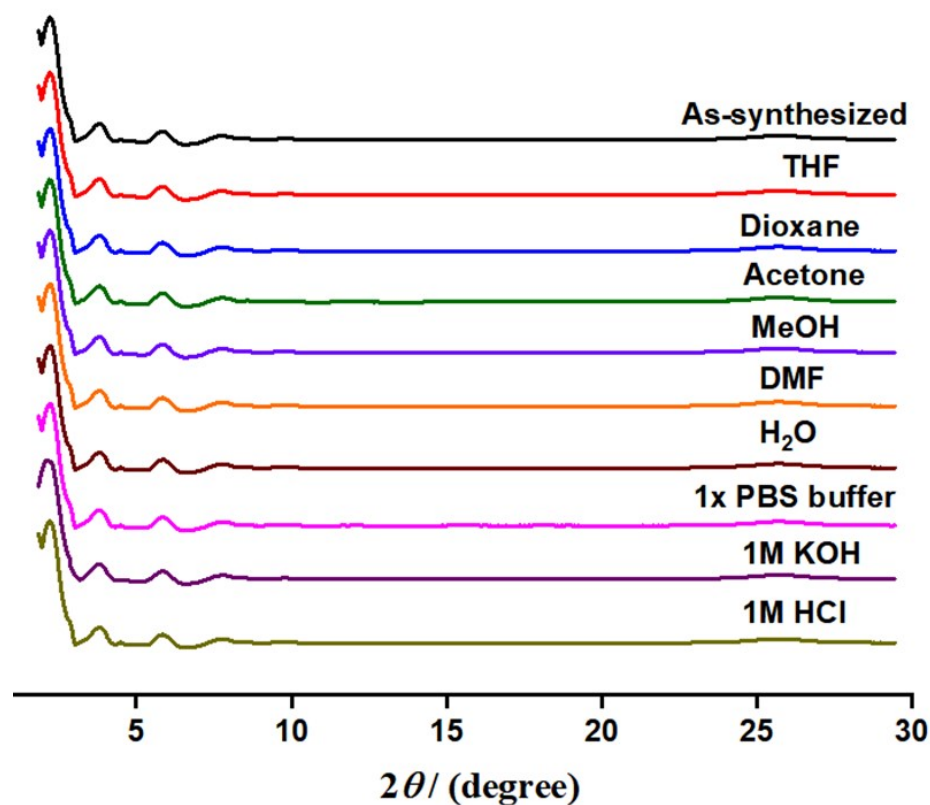

**Figure S11.** PXRD patterns of the TFPB-DHTH COF as-synthesized and after immersing 2 days in various solvents.

**TableS3.** BET surface areas of the TFPB-DHTH COF as-synthesized and after immersing 2 days in various solvents.

| TFPB-DHTH COF    | $S_{\text{BET}}$<br>( $\text{m}^2 \text{g}^{-1}$ ) |
|------------------|----------------------------------------------------|
| As-synthesized   | 360                                                |
| THF              | 358                                                |
| Acetone          | 355                                                |
| DMF              | 340                                                |
| H <sub>2</sub> O | 360                                                |
| 1x PBS buffer    | 259                                                |
| 1M KOH           | 335                                                |
| 1M HCl           | 332                                                |

## S10. Photophysical Properties of TFPB-DHTH COF

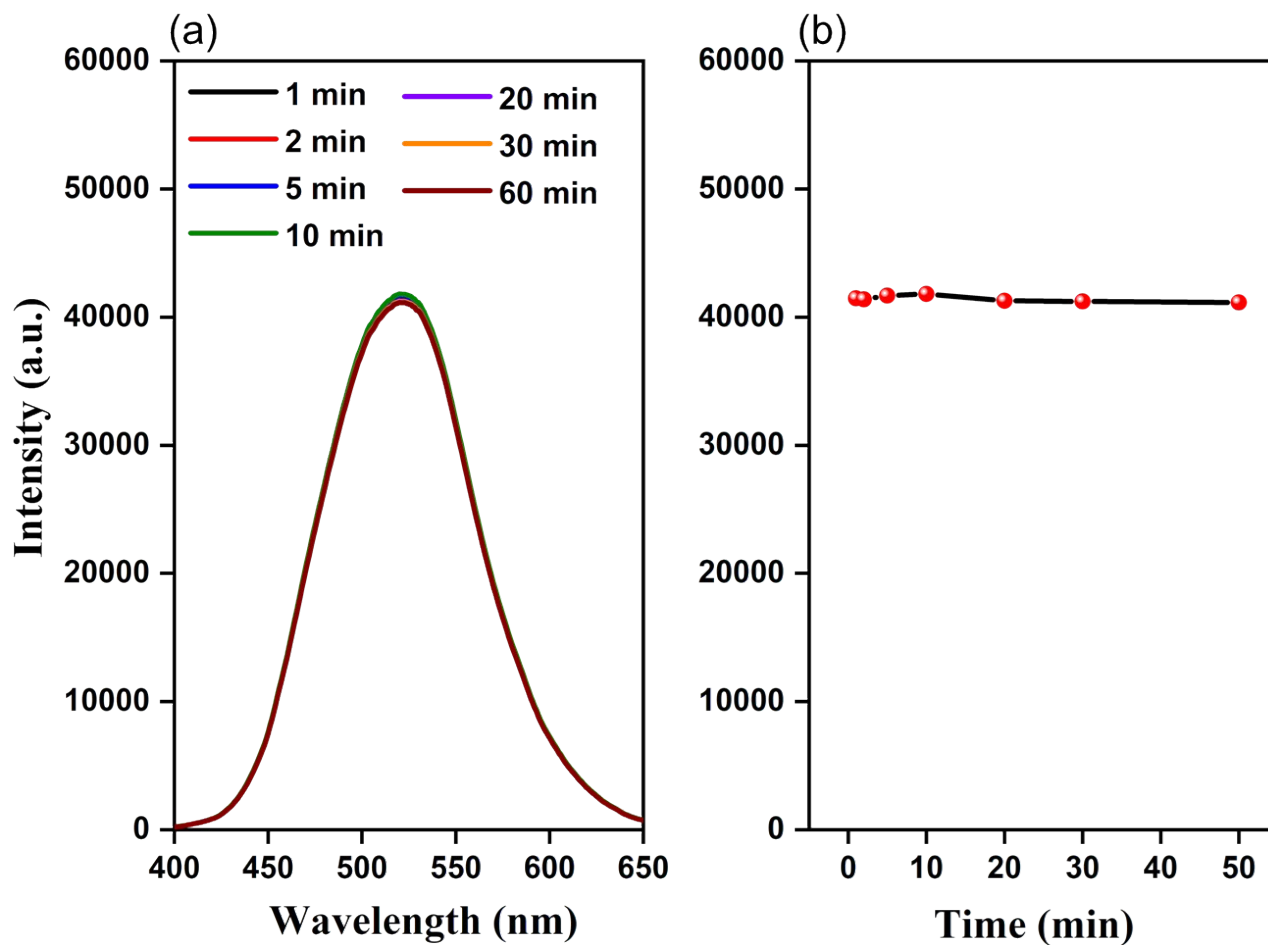

**Figure S12.** (a) Time-dependent fluorescence emission spectra and (b) Time-dependent fluorescence emission intensities at wavelength of 520 nm of the TFPB-DHTH COF dissolved in water within 60 mins (excitation at 365 nm).

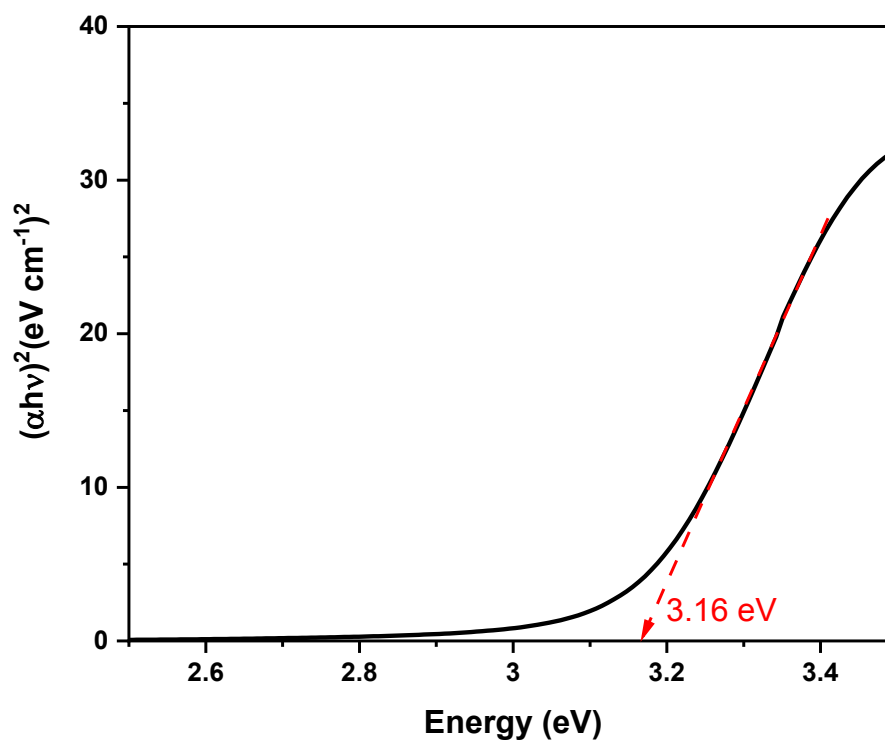

**Figure S13.** Bandgaps of TFPB-DHTH COF calculated by Tauc-plot.

## S11. X-Ray photoelectron spectroscopy (XPS) analysis

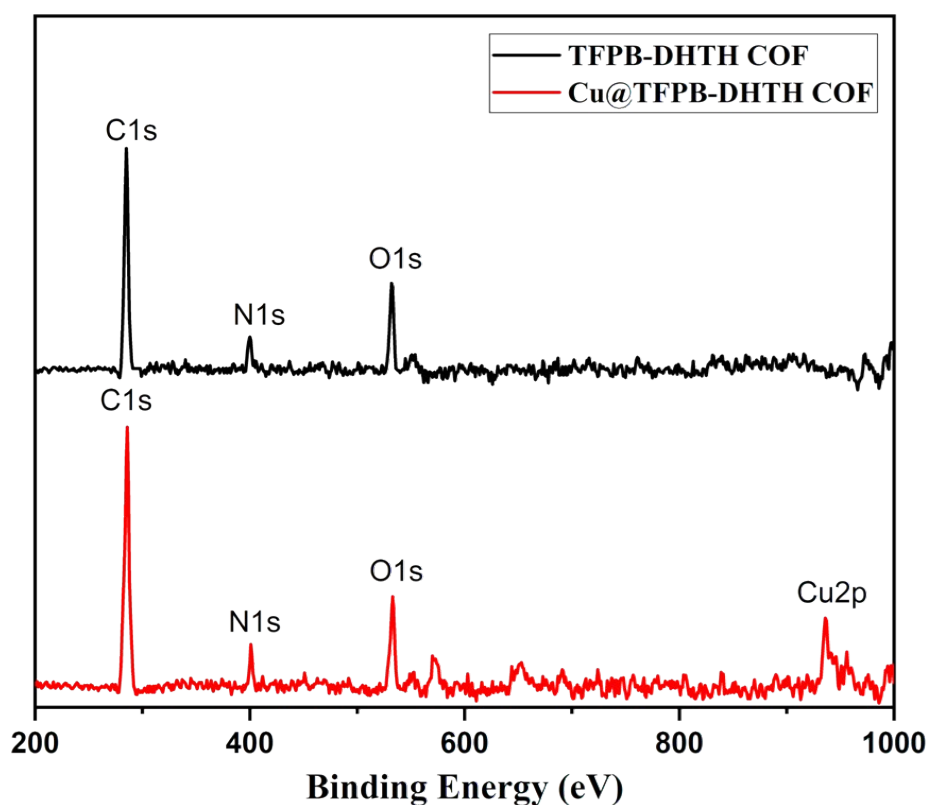

Figure S14. XPS spectra of TFPB-DHTH and Cu@TFPB-DHTH COFs.

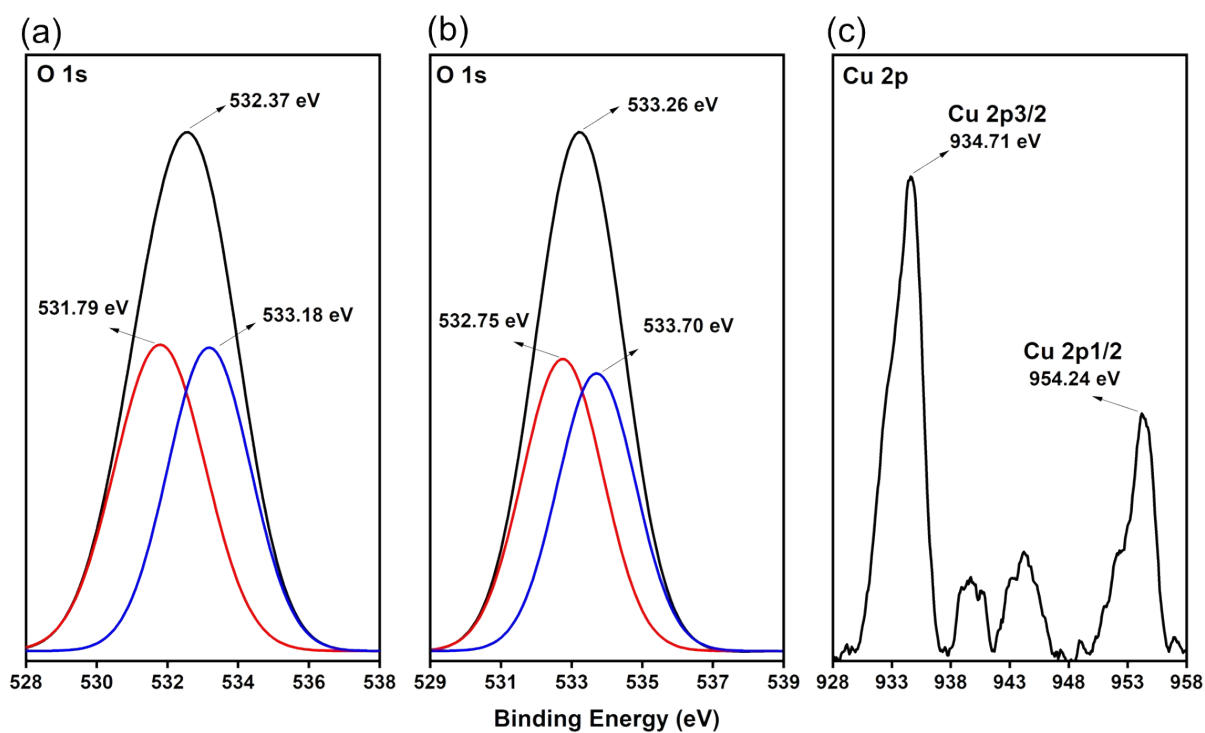

Figure S15. O 1s XPS spectra of (a) TFPB-DHTH and (b) Cu@TFPB-DHTH COFs. Cu 2p XPS spectrum of (c) Cu@TFPB-DHTH COF.

## S12. “OFF-ON” Fluorescence Detection Assay



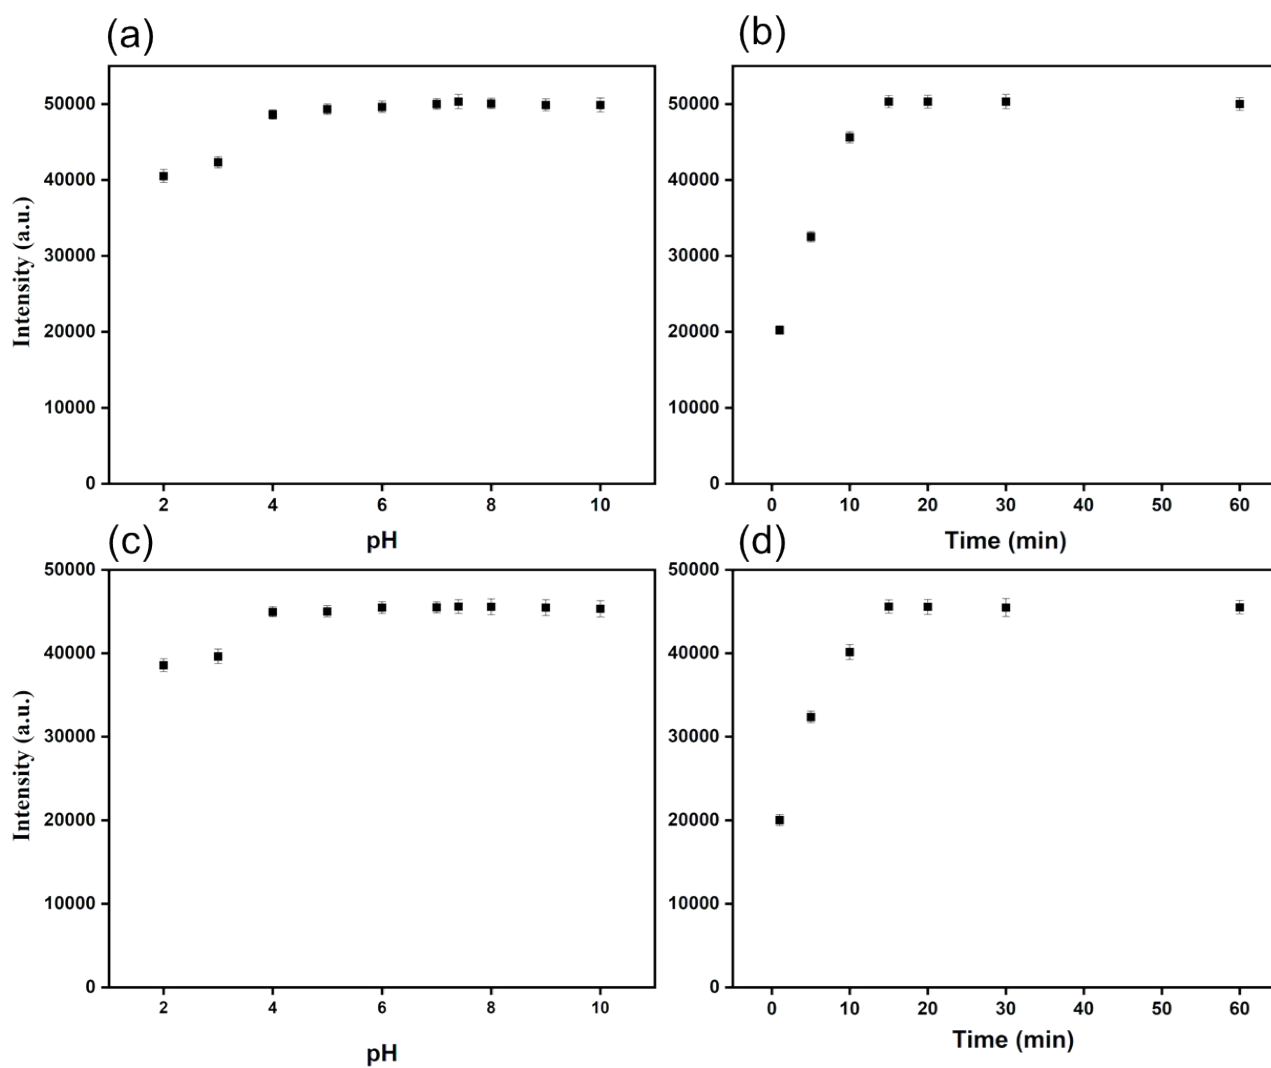

**Figure S16.** The effect of (a, c) pH and (b, d) time on the fluorescence recovery of the emission peak at wavelength of 520 nm in the presence of (a, b) cysteine (400  $\mu\text{M}$ ) or (c, d) L-histidine (500  $\mu\text{M}$ ).

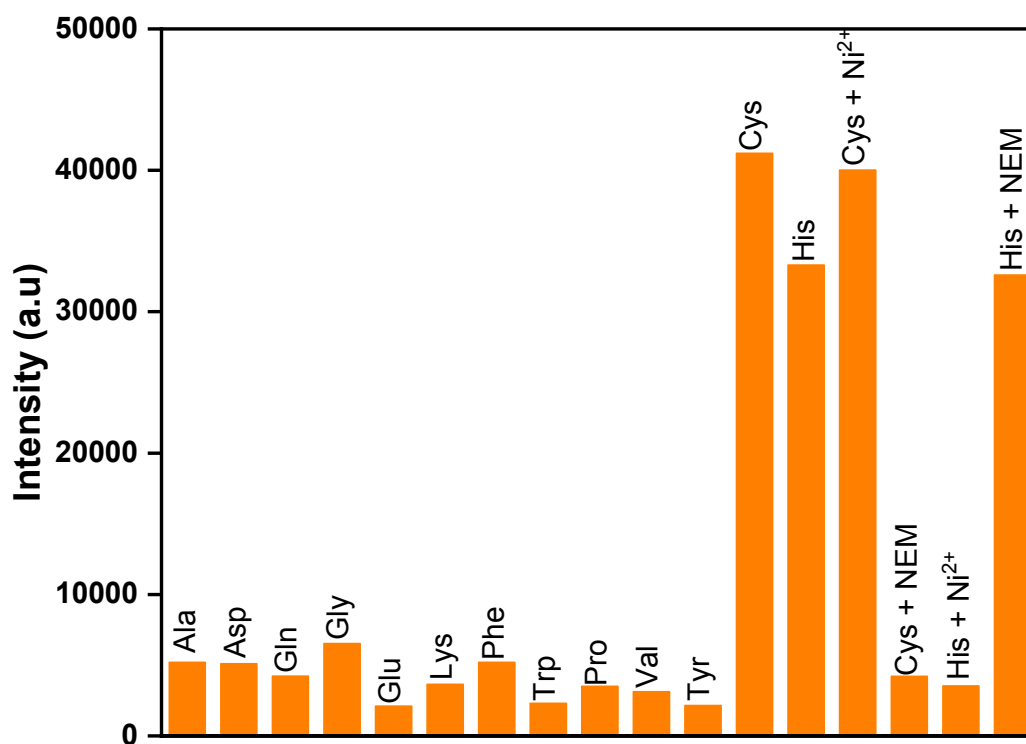

**Figure S17.** Fluorescence emission intensities at wavelength of 520 nm of the Cu@TFPB-DHTH COF dissolved in 1X PBS buffer (pH = 7.4) in the presence of cysteine, histidine and other amino acids. Measurements were carried out at a Cu@TFPB-DHTH COF concentration of 0.125 mg mL<sup>-1</sup> COF and 200  $\mu$ M Cu<sup>2+</sup> ion and a concentration of amino acid of 200  $\mu$ M under excitation at 365 nm.

**Table S4.** Comparison of detection limit with previously reported methods for cysteine and  $L$ -histidine.

|                | Probe                                                    | Limit of detection | Ref.             |
|----------------|----------------------------------------------------------|--------------------|------------------|
| Cysteine       |                                                          |                    |                  |
|                | Organic molecule                                         | 460 nM             | S1               |
|                | Organic molecule                                         | 874 nM             | S2               |
|                | Organic molecule                                         | 8400 nM            | S3               |
|                | DPAS-Cys                                                 | 2400 nM            | S4               |
|                | FSD-103-Cu <sup>2+</sup>                                 | 200 nM             | S5               |
|                | AgAuNCs@11-MUA-Cu <sup>2+</sup>                          | 111 nM             | S6               |
| $L$ -histidine | Cu@TFPB-DHTH COF                                         | 340 nM             | <b>This work</b> |
|                | AgAuNCs@11-MUA-Cu <sup>2+</sup>                          | 87 nM              | S6               |
|                | Ni <sup>2+</sup> -modulated Hcy-capped CdTe QDs          | 200 nM             | S7               |
|                | [Cu(LH <sub>2</sub> )Cl <sub>2</sub> ]·2H <sub>2</sub> O | 1890 nM            | S8               |
|                | EPANS-based probe                                        | 1000 nM            | S9               |
|                | Chiral carbazole with urea-carboxylic acid moiety (CCS)  | 7640 nM            | S10              |
|                | ruthenium(II) tris(bipyridine) derivative (Ru-DPA)       | 1380               | S11              |
|                | Cu@TFPB-DHTH COF                                         | 520 nM             | <b>This work</b> |

### S13. Reference

- [S1] Y. Yue, F. Huo, P. Ning, Y. Zhang, J. Chao, X. Meng and C. Yin, *J. Am. Chem. Soc.*, 2017, **8**, 3181–3185.
- [S2] C. Chen, W. Liu, C. Xu and W. Liu, *Biosens. Bioelectron.*, 2016, **85**, 46–52.
- [S3] L. Bu, J. Chen, X. Wei, X. Li, H. Ågren and Y. Xie, *Dyes Pigm.*, 2017, **136**, 724–731.
- [S4] W. Cheng, X. Xue, F. Zhang, B. Zhang, T. Li, L. Peng, D. H. Cho, H. Chen, J. Fang, and X. Chen, *Analytica Chimica Acta*, 2020, **1127**, 20–28.
- [S5] Y. Caia, J. Fang, H. Zhu, W. Qin, Y. Cao, H. Yu, G. Shao, Y. Liu, and W. Liu, *Sens. Actuators B-Chem.*, 2020, **303**, 127214.
- [S6] J. Sun, F. Yang, D. Zhao, C. Chen, and X. Yang, *ACS Appl. Mater. Interfaces*, 2015, **7**, 6860–6866.
- [S7] P. Wu, and X. -P. Yan, *Biosens. Bioelectron.*, 2010, **26**, 485–490.
- [S8] C. Das, B. Pakhira, A. L. Rheingold, and S. K. Chattopadhyay, *Inorganica Chim. Acta*, 2018, **482**, 292–298.
- [S9] X. Li, H. Ma, L. Nie, M. Sun, and S. Xiong, *Anal. Chim. Acta*, 2004, **515**, 255–260.
- [S10] A. Pundi, C. J. Chang, J. Chen, S. R. Hsieh, and M. C. Lee, *Sens. Actuators B-Chem.*, 2021, **328**, 129084.
- [S11] Y. Yang, Y. Li, X. Zhi, Y. Xu, and M. Li, *Dyes Pigm.*, 2020, **183**, 108690.
